# Supplementary material for: Determination of trace heavy metal elements in litterfall by inductively coupled plasma optical emission spectrometry after extraction using choline chloride-based deep eutectic solvents
Source: Royal Society of Chemistry journal article supplement (doi:10.1039/d4ra02573c), 2024-01-01
Supplement: d4ra02573c1.pdf [file d4ra02573c1.pdf]

## **Supplementary Information**

### **Determination of trace heavy metal elements in litterfall by inductively coupled plasma optical emission spectrometry after extraction using choline chloride-based deep eutectic solvents**

Junlei Zhong<sup>1,2 #</sup>, Zhikun Wang<sup>1,2,3#</sup>, Yujie Chen<sup>2,3</sup>, Weiwei Huan<sup>2</sup>, Man Shi<sup>2,3</sup>, Lixin Lei<sup>2,3</sup>, Xuejun Yu<sup>2,3\*</sup>, Liang Chen<sup>1,2 \*</sup>

<sup>1</sup> *Department of Optical Engineering, College of Optical, Mechanical and Electrical Engineering, Zhejiang A&F University, Hangzhou, Zhejiang, 311300, P.R. China*

<sup>2</sup> *State Key Laboratory of Subtropical Silviculture, Zhejiang A&F University, Lin'an, 311300 Zhejiang Province, China*

<sup>3</sup> *Bamboo Industry Institute, Zhejiang A&F University, Lin'an, 311300 Zhejiang Province, China*

# These authors contributed equally to this work.

\* **Corresponding author:** liangchen@zafu.edu.cn (L. C.); yuxj@zafu.edu.cn (X.Y.)

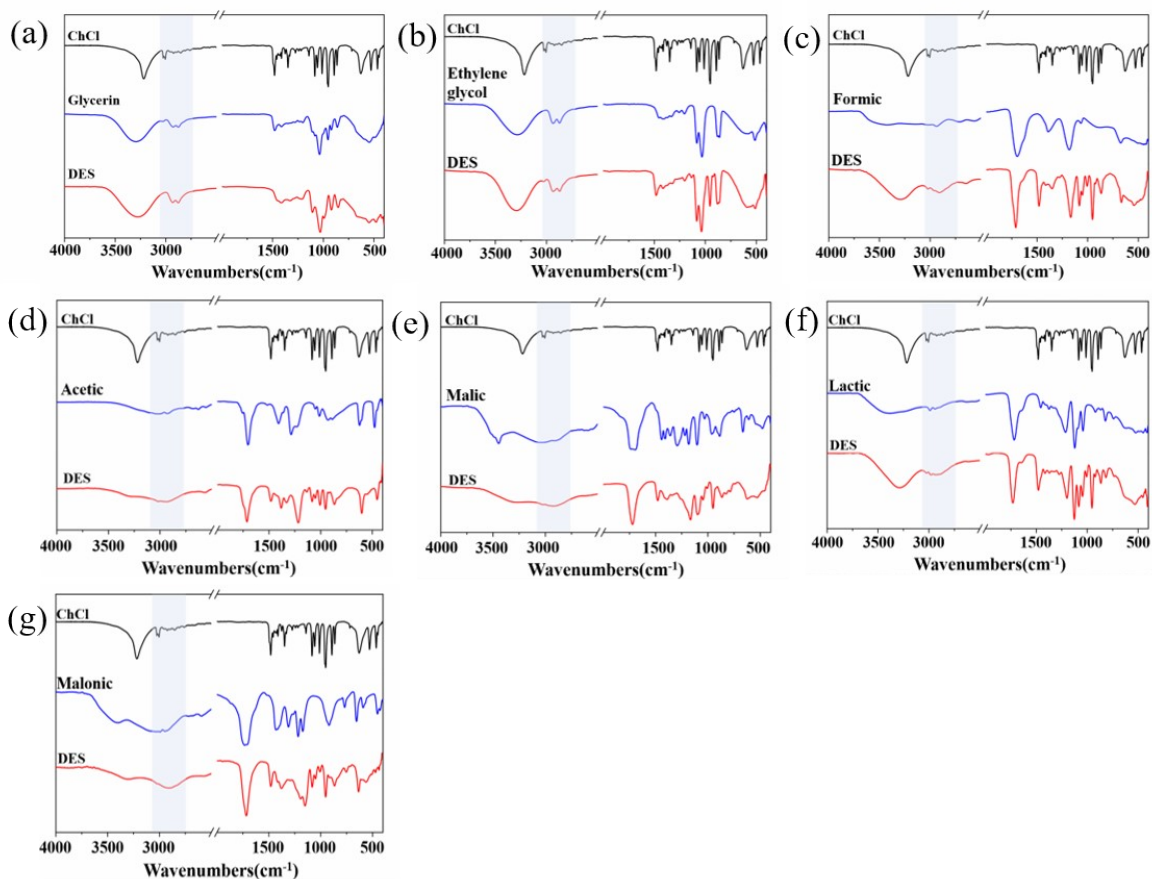

**Fig. S1** (a) FT-IR spectra of ChCl , Glycerin acid and DES; (b) FT-IR spectra of ChCl , Ethylene acid and DES; (c) FT-IR spectra of ChCl , Formic acid and DES; (d) FT-IR spectra of ChCl , Acetic acid and DES; (e) FT-IR spectra of ChCl , Malic acid and DES; (f) FT-IR spectra of ChCl , Lactic acid and DES; (g) FT-IR spectra of ChCl , Malonic acid and DES.

**Table S1** Comparative study of the new method with reported methods in the literature.

| Sample         | Element | Extraction solvent                                                  | Analytical technique | LOD ( $\mu\text{g/g}$ ) | RSD (%) | Linear Range ( $\mu\text{g/g}$ ) | Ref       |
|----------------|---------|---------------------------------------------------------------------|----------------------|-------------------------|---------|----------------------------------|-----------|
| Tap, mineral   | Cu      | aliquat 336 and lauric acid: menthol                                | FAAS                 | 1.58                    | 5.00    | 10–500                           | 1         |
| Tap, spring    |         | N,N'-bis(2-salicylaldiminato)-1,8-diamino-3,6-dioxaoctane           | FAAS                 | 1.90                    | 3.80    | 8–400                            | 2         |
| Fish-Muscle    |         | Chloride, oxalic                                                    | ICP-OES              | 0.08                    | 6.30    | —                                | 3         |
| Tobacco leaves |         | choline chloride and malic acid                                     | ICP-OES              | 0.90                    | 2.50    | 2-1000                           | 4         |
| Bamboo litter  |         | Choline chloride and maleic acid                                    | ICP-OES              | 0.18                    | 1.14    | 1-300                            | This work |
| Milk           | Cd      | sorbitol, menthol and mandelic acid                                 | FAAS                 | 0.38                    | 4.10    | 1-40                             | 5         |
| Oil            |         | glycolic acid and mandelic acid                                     | FAAS                 | 0.12                    | 4.10    | 10-500                           | 6         |
| Lettuce        |         | 2-mercapto benzo thiazole (MBT), copper                             | GFAAS                | 0.02                    | —       | —                                | 7         |
| Bamboo litter  |         | choline chloride and maleic acid                                    | ICP-OES              | 0.04                    | 2.30    | 0.2-200                          | This work |
| Water          | Fe      | 3-hydroxy-1-(3-hydroxyphenyl)-2-methylpyridin-4(1H)-one (3-OH-PMPO) | UV-160PC             | 5.00                    | 4.20    | 10–750                           | 8         |
| Oysters        |         | Suprapur nitric and hydrochloric acid                               | AFFS                 | 0.46                    | 3.80    | —                                | 9         |
| Fish Muscle    |         | Chloride, oxalic acid                                               | ICP-OES              | 0.56                    | 2.20    | —                                | 3         |
| Bamboo litter  |         | choline chloride and maleic acid                                    | ICP-OES              | 0.70                    | 2.30    | 1-1000                           | This work |
| Tobacco leaves | Zn      | choline chloride and malic acid                                     | ICP-OES              | 0.02                    | 2.00    | 0.5–200                          | 4         |
| Fish           |         | Choline chloride and Phenol                                         | AFFS                 | 0.04                    | 1.70    | —                                | 10        |
| Fish           |         | APDC, HNO <sub>3</sub> , Acetone                                    | AFFS                 | 0.03                    | 6.00    | —                                | 11        |
| Bamboo litter  |         | choline chloride and maleic acid                                    | ICP-OES              | 0.59                    | 0.50    | 0.2-500                          | This work |

## References

1. Y. Bakircioglu Kurtulus, D. Bakircioglu and N. Topraksever, *Journal of Food Composition and Analysis*, 2022, 112.
2. M. Rajabi, S. Asemipour, B. Barfi, M. R. Jamali and M. Behzad, *Journal of Molecular Liquids*, 2014, 194, 166-171.
3. K. Ghanemi, M.-A. Navidi, M. Fallah-Mehrjardi and A. Dadolahi-Sohrab, *Anal. Methods*, 2014, 6, 1774-1781.
4. A. Shishov, A. Gerasimov and A. Bulatov, *Food Chemistry*, 2022, 366.
5. S. M. Sorouraddin, M. A. Farajzadeh and H. Dastoori, *Talanta*, 2020, 208.
6. S. M. Sorouraddin, M. A. Farajzadeh and T. Okhravi, *Journal of Food Composition and Analysis*, 2020, 93.
7. T. Oymak, Ş. Tokalioğlu, V. Yılmaz, Ş. Kartal and D. Aydın, *Food Chemistry*, 2009, 113, 1314-1317.
8. M. Borzoei, M. A. Zanjanchi, H. Sadeghi-aliabadi and L. Saghaie, *Food Chemistry*, 2018, 264, 9-15.
9. E. G. P. da Silva, V. Hatje, W. N. L. dos Santos, L. M. Costa, A. R. A. Nogueira and S. L. C. Ferreira, *Journal of Food Composition and Analysis*, 2008, 21, 259-263.
10. H. U. Haq, M. Balal, R. Castro-Muñoz, Z. Hussain, F. Safi, S. Ullah and G. Boczkaj, *Journal of Molecular Liquids*, 2021, 333.
11. A. Imyim, P. Daorattanachai and F. Unob, *Analytical Letters*, 2013, 46, 2101-2110.
